# Supplementary material
Source: PubMed Central journal article supplement (PMC6442356)
Supplement: 141941_1_supp_273452_plsfqg.pdf [file 141941_1_supp_273452_plsfqg.pdf]

## **Supplementary material**

### **Supplementary Table 1.**

Protein information (Name, Short name, UniprotID and coding gene) for the 80 proteins used.

### **Supplementary Table 2.**

Results from the 28 proteins that were significant in the Discovery cohort in the univariate analysis. P-values and mean differences in normalized values between cases and controls in both the discovery and replication cohorts.

### **Supplementary Table 3.**

Results (Beta, variance explained and p-value) from modelling normalized abundance levels from time to diagnosis, before and after diagnosis, for the 80 proteins.

### **Supplementary Table 4.**

Results (P-values and mean differences) from comparing normalized protein abundance levels in the replication cohort between control samples and samples taken before and after diagnosis for the 28 proteins that were significantly changed in the univariate analysis in the discovery cohort.

## Supplementary Table 1

| Protein Name                                                           | UniprotID      | Gene       | Short name     |
|------------------------------------------------------------------------|----------------|------------|----------------|
| Eukaryotic translation initiation factor 4E-binding protein 1 (4E-BP1) | Q13541         | EIF4EBP1   | 4E-BP1         |
| Adenosine Deaminase (ADA)                                              | P00813         | ADA        | ADA            |
| Agouti-related protein (AGRP)                                          | O00253         | AGRP       | AGRP           |
| Amphiregulin (AR)                                                      | P15514         | AREG       | AR             |
| Axin-1 (AXIN1)                                                         | O15169         | AXIN1      | AXIN1          |
| Brain-derived neurotrophic factor                                      | P23560         | BDNF       | BDNF           |
| Beta-nerve growth factor (Beta-NGF)                                    | P01138         | NGF        | Beta-NGF       |
| C-C motif chemokine 19 (CCL19)                                         | Q99731         | CCL19      | CCL19          |
| C-C motif chemokine 20 (CCL20)                                         | P78556         | CCL20      | CCL20          |
| C-C motif chemokine 23 (CCL23)                                         | P55773         | CCL23      | CCL23          |
| C-C motif chemokine 28 (CCL28)                                         | Q9NRJ3         | CCL28      | CCL28          |
| C-C motif chemokine 3 (CCL3)                                           | P10147         | CCL3       | CCL3           |
| C-C motif chemokine 4 (CCL4)                                           | P13236         | CCL4       | CCL4           |
| Natural killer cell receptor 2B4 (CD244)                               | Q9BZW8         | CD244      | CD244          |
| CD40L receptor (CD40)                                                  | P25942         | CD40       | CD40           |
| CD40 ligand (CD40-L)                                                   | P29965         | CD40LG     | CD40-L         |
| T-cell surface glycoprotein CD5 (CD5)                                  | P06127         | CD5        | CD5            |
| CUB domain-containing protein 1 (CDCP1)                                | Q9H5V8         | CDCP1      | CDCP1          |
| Macrophage colony-stimulating factor 1 (CSF-1)                         | P09603         | CSF1       | CSF1           |
| Cystatin D (CST5)                                                      | P28325         | CST5       | CST5           |
| Fractalkine (CX3CL1)                                                   | P78423         | CX3CL1     | CX3CL1         |
| C-X-C motif chemokine 1 (CXCL1)                                        | P09341         | CXCL1      | CXCL1          |
| C-X-C motif chemokine 10 (CXCL10)                                      | P02778         | CXCL10     | CXCL10         |
| C-X-C motif chemokine 5 (CXCL5)                                        | P42830         | CXCL5      | CXCL5          |
| C-X-C motif chemokine 9 (CXCL9)                                        | Q07325         | CXCL9      | CXCL9          |
| Dickkopf-related protein 1 (Dkk-1)                                     | O94907         | DKK1       | Dkk-1          |
| Fas antigen ligand (FasL)                                              | P48023         | FASLG      | FASLG          |
| Fibroblast growth factor 21 (FGF-21)                                   | Q9NSA1         | FGF21      | FGF-21         |
| Fibroblast growth factor 23 (FGF-23)                                   | Q9GZV9         | FGF23      | FGF-23         |
| Fibroblast growth factor 5 (FGF-5)                                     | Q8NF90         | FGF5       | FGF-5          |
| Folate receptor alpha (FR-alpha)                                       | P15328         | FOLR1      | FRalpha        |
| Follistatin (FS)                                                       | P19883         | FST        | FS             |
| Proheparin-binding EGF-like growth factor (HB-EGF)                     | Q99075         | HBEGF      | HB-EGF         |
| Glial cell line-derived neurotrophic factor (GDNF)                     | P39905         | GDNF       | hGDNF          |
| Hepatocyte growth factor (HGF)                                         | P14210         | HGF        | HGF            |
| Heat shock 27 kDa protein (HSP 27)                                     | P04792         | HSPB1      | HSP-27         |
| Interleukin-10 (IL-10)                                                 | P22301         | IL10       | IL-10          |
| Interleukin-10 receptor subunit alpha (IL-10RA)                        | Q13651         | IL10RA     | IL-10RA        |
| Interleukin-12 subunit beta (IL-12B)                                   | P29460         | IL12B      | IL-12B         |
| Interleukin-15 receptor subunit alpha (IL-15RA)                        | Q13261         | IL15RA     | IL-15RA        |
| Interleukin-17A (IL-17A)                                               | Q16552         | IL17A      | IL-17A         |
| Interleukin-17C (IL-17C)                                               | Q9POM4         | IL17C      | IL-17C         |
| Interleukin-18 (IL-18)                                                 | Q14116         | IL18       | IL-18          |
| Interleukin-18 receptor 1 (IL-18R1)                                    | Q13478         | IL18R1     | IL-18R1        |
| Interleukin-20 receptor subunit alpha (IL-20RA)                        | Q9UHF4         | IL20RA     | IL-20RA        |
| Interleukin-5 (IL-5)                                                   | P05113         | IL5        | IL-5           |
| Interleukin-6 (IL-6)                                                   | P05231         | IL6        | IL-6           |
| Interleukin-7 (IL-7)                                                   | P13232         | IL7        | IL-7           |
| Interleukin-8 (IL-8)                                                   | P10145         | CXCL8      | IL-8           |
| Interleukin-27 (IL-27)                                                 | Q8NEV9, Q14213 | IL27, EBI3 | IL-27          |
| Melusin (ITGB1BP2)                                                     | Q9UKP3         | ITGB1BP2   | ITGB1BP2       |
| Leukemia inhibitory factor receptor (LIF-R)                            | P42702         | LIFR       | LIF-R          |
| MHC class I polypeptide-related sequence A/B (MIC-A/B)                 | Q29983, Q29980 | MICA, MICB | MIC-A          |
| Midkine (MK)                                                           | P21741         | MDK        | MK             |
| Matrix metalloproteinase-1 (MMP-1)                                     | P03956         | MMP1       | MMP-1          |
| Matrix metalloproteinase-10 (MMP-10)                                   | P09238         | MMP10      | MMP-10         |
| Mucin-16 (MUC-16)                                                      | Q8WXI7         | MUC16      | MUC16          |
| NF-kappa-B essential modulator (NEMO)                                  | Q9Y6K9         | IKBKG      | NEMO           |
| Neurotrophin-3 (NT-3)                                                  | P20783         | NTF3       | NT-3           |
| Osteoprotegerin (OPG)                                                  | O00300         | TNFRSF11B  | OPG            |
| Oncostatin-M (OSM)                                                     | P13725         | OSM        | OSM            |
| Pappalysin-1 (PAPPA)                                                   | Q13219         | PAPPA      | PAPP-A         |
| Platelet-derived growth factor subunit B (PDGF subunit B)              | P01127         | PDGFB      | PDGF-subunit-B |

|                                                               |        |         |         |
|---------------------------------------------------------------|--------|---------|---------|
| P-selectin glycoprotein ligand 1 (PSGL-1)                     | Q14242 | SELPLG  | PSGL-1  |
| Pentraxin-related protein PTX3 (PTX3)                         | P26022 | PTX3    | PTX3    |
| Receptor for advanced glycosylation end products (RAGE)       | Q15109 | AGER    | RAGE    |
| Stem cell factor (SCF)                                        | P21583 | KITLG   | SCF     |
| SIR2-like protein 2 (SIRT2)                                   | Q8IXJ6 | SIRT2   | SIRT2   |
| Signaling lymphocytic activation molecule (SLAMF1)            | Q13291 | SLAMF1  | SLAMF1  |
| Proto-oncogene tyrosine-protein kinase Src (SRC)              | P12931 | SRC     | SRC     |
| Sulfotransferase 1A1 (ST1A1)                                  | P50225 | SULT1A1 | ST1A1   |
| STAM-binding protein (STAMPB)                                 | O95630 | STAMPB  | STAMPB  |
| Transforming growth factor alpha (TGF-alpha)                  | P01135 | TGFA    | TGFA    |
| TNF-beta (TNFB)                                               | P01374 | LTA     | TNFB    |
| Tumor necrosis factor receptor superfamily member 9 (TNFRSF9) | Q07011 | TNFRSF9 | TNFRSF9 |
| Tumor necrosis factor ligand superfamily member 14 (TNFSF14)  | O43557 | TNFSF14 | TNFSF14 |
| TNF-related apoptosis-inducing ligand (TRAIL)                 | P50591 | TNFSF10 | TRAIL   |
| TNF-related activation-induced cytokine (TRANCE)              | O14788 | TNFSF11 | TRANCE  |
| Tumor necrosis factor (Ligand) superfamily, member 12 (TWEAK) | O43508 | TNFSF12 | TWEAK   |
| Vascular endothelial growth factor A (VEGF-A)                 | P15692 | VEGFA   | VEGF-A  |

## Supplementary Table 2

| Protein Short Name | Discovery Cohort |                             | Replication Cohort |                             |
|--------------------|------------------|-----------------------------|--------------------|-----------------------------|
|                    | P-value          | mean Difference (case-ctrl) | P-value            | mean Difference (case-ctrl) |
| ITGB1BP2           | 1,36E-41         | 6,87                        | 3,93E-06           | 0,86                        |
| PTX3               | 6,67E-40         | 4,25                        | 5,97E-17           | 1,86                        |
| SIRT2              | 4,19E-39         | 5,26                        | 8,00E-03           | 0,40                        |
| AXIN1              | 6,23E-39         | 5,56                        | 1,93E-01           | -0,19                       |
| 4E-BP1             | 3,14E-37         | 3,68                        | 2,98E-02           | 0,34                        |
| STAMBP             | 4,36E-35         | 5,22                        | 9,30E-01           | -0,01                       |
| FS                 | 1,38E-28         | 2,74                        | 1,00E-04           | 0,73                        |
| HB-EGF             | 9,35E-28         | 6,03                        | 2,85E-06           | 1,17                        |
| SRC                | 1,22E-27         | 2,67                        | 1,41E-03           | 0,67                        |
| NEMO               | 2,47E-27         | 4,61                        | 2,84E-04           | 0,61                        |
| hGDNF              | 1,06E-18         | 2,79                        | 7,52E-02           | 0,30                        |
| MK                 | 1,74E-16         | 1,86                        | 9,91E-11           | 1,44                        |
| PAPP-A             | 3,13E-16         | 1,09                        | 5,19E-07           | 1,13                        |
| IL-27              | 3,92E-16         | 1,71                        | 2,28E-14           | 1,63                        |
| CD40-L             | 3,32E-13         | 1,86                        | 5,59E-07           | 0,92                        |
| NT-3               | 1,35E-10         | 1,42                        | 6,74E-01           | 0,07                        |
| VEGF-A             | 3,15E-10         | 1,78                        | 9,22E-02           | 0,41                        |
| IL-7               | 4,44E-10         | 1,39                        | 3,94E-01           | 0,13                        |
| RAGE               | 4,89E-09         | 1,12                        | 1,26E-02           | -0,45                       |
| IL-15RA            | 1,02E-06         | 0,89                        | 6,27E-01           | 0,08                        |
| CD40               | 1,24E-06         | 1,14                        | 3,08E-01           | -0,16                       |
| AR                 | 1,10E-05         | 1,08                        | 1,35E-11           | 1,09                        |
| HSP-27             | 2,24E-05         | 0,70                        | 3,84E-07           | 0,96                        |
| ST1A1              | 2,61E-05         | 0,84                        | 6,82E-01           | 0,06                        |
| IL-5               | 4,56E-05         | 0,89                        | 3,78E-01           | -0,09                       |
| CCL28              | 7,47E-05         | 0,75                        | 9,37E-03           | 0,40                        |
| CD244              | 1,43E-04         | 0,78                        | 3,71E-05           | -0,59                       |
| FR-alpha           | 2,16E-04         | 0,67                        | 2,09E-03           | 0,66                        |

Supplementary Table 3

| Protein Short Name | Before Diagnosis |                    |          | After Diagnosis |                    |          |
|--------------------|------------------|--------------------|----------|-----------------|--------------------|----------|
|                    | Beta             | Variance Explained | p-value  | Beta            | Variance Explained | p-value  |
| 4E-BP1             | -6,40E-05        | 5,35E-03           | 2,79E-01 | 1,08E-05        | 2,10E-04           | 8,36E-01 |
| ADA                | -3,05E-05        | 1,80E-03           | 5,31E-01 | -9,07E-06       | 3,25E-04           | 7,96E-01 |
| AGRP               | 1,15E-04         | 1,86E-02           | 4,27E-02 | -3,75E-05       | 2,41E-03           | 4,82E-01 |
| AR                 | -1,01E-04        | 1,79E-02           | 4,70E-02 | 6,89E-05        | 1,95E-02           | 4,40E-02 |
| AXIN1              | -1,06E-05        | 1,53E-04           | 8,55E-01 | -1,17E-04       | 2,06E-02           | 3,87E-02 |
| BDNF               | -4,20E-06        | 2,47E-05           | 9,41E-01 | -6,49E-05       | 6,71E-03           | 2,39E-01 |
| Beta-NGF           | -6,01E-05        | 5,98E-03           | 2,52E-01 | -2,36E-05       | 1,15E-03           | 6,27E-01 |
| CCL19              | 7,91E-05         | 7,70E-03           | 1,94E-01 | 5,72E-05        | 7,45E-03           | 2,15E-01 |
| CCL20              | -6,26E-05        | 6,75E-03           | 2,24E-01 | 7,72E-06        | 1,17E-04           | 8,77E-01 |
| CCL23              | 8,52E-05         | 9,48E-03           | 1,49E-01 | 8,24E-05        | 1,41E-02           | 8,73E-02 |
| CCL28              | -2,04E-05        | 7,41E-04           | 6,87E-01 | 7,27E-05        | 7,77E-03           | 2,05E-01 |
| CCL3               | -1,45E-04        | 2,96E-02           | 1,03E-02 | -7,07E-05       | 8,81E-03           | 1,77E-01 |
| CCL4               | -1,69E-04        | 6,27E-02           | 1,69E-04 | -7,74E-06       | 2,12E-04           | 8,35E-01 |
| CD244              | 1,91E-05         | 5,09E-04           | 7,39E-01 | 5,07E-06        | 6,37E-05           | 9,09E-01 |
| CD40               | -8,55E-05        | 1,12E-02           | 1,17E-01 | -7,82E-05       | 1,50E-02           | 7,78E-02 |
| CD40-L             | -7,14E-05        | 6,44E-03           | 2,35E-01 | -5,99E-05       | 5,32E-03           | 2,95E-01 |
| CD5                | -1,05E-04        | 1,74E-02           | 5,00E-02 | 2,67E-05        | 1,79E-03           | 5,45E-01 |
| CDCP1              | -4,17E-05        | 2,38E-03           | 4,71E-01 | -4,12E-05       | 3,41E-03           | 4,02E-01 |
| CSF-1              | -4,26E-05        | 1,79E-03           | 5,32E-01 | 3,74E-05        | 2,23E-03           | 4,98E-01 |
| CST5               | -7,89E-06        | 8,76E-05           | 8,90E-01 | 6,17E-06        | 9,88E-05           | 8,87E-01 |
| CX3CL1             | -1,00E-04        | 1,73E-02           | 5,10E-02 | 3,31E-05        | 2,20E-03           | 5,01E-01 |
| CXCL1              | -1,35E-04        | 2,08E-02           | 3,22E-02 | -9,69E-05       | 1,62E-02           | 6,73E-02 |
| CXCL10             | -8,28E-05        | 9,70E-03           | 1,44E-01 | 9,12E-05        | 1,08E-02           | 1,35E-01 |
| CXCL5              | -3,35E-06        | 1,39E-05           | 9,56E-01 | -4,37E-05       | 3,45E-03           | 3,99E-01 |
| CXCL9              | 1,62E-07         | 3,76E-08           | 9,98E-01 | 1,28E-04        | 3,32E-02           | 8,45E-03 |
| Dkk-1              | -3,93E-05        | 1,97E-03           | 5,11E-01 | -2,96E-05       | 1,47E-03           | 5,82E-01 |
| FASLG              | 1,18E-05         | 1,40E-04           | 8,61E-01 | 1,45E-05        | 2,38E-04           | 8,25E-01 |
| FGF-21             | -9,16E-05        | 1,35E-02           | 8,48E-02 | 9,12E-05        | 1,70E-02           | 6,07E-02 |
| FGF-23             | -3,32E-05        | 1,86E-03           | 5,24E-01 | 6,72E-05        | 2,72E-02           | 1,73E-02 |
| FGF-5              | -6,23E-05        | 5,63E-03           | 2,67E-01 | 8,15E-05        | 1,09E-02           | 1,34E-01 |
| FR-alpha           | -1,87E-04        | 5,81E-02           | 2,99E-04 | -2,72E-05       | 1,79E-03           | 5,44E-01 |
| FS                 | 2,18E-05         | 5,77E-04           | 7,23E-01 | 1,95E-05        | 7,24E-04           | 7,00E-01 |
| HB-EGF             | -1,79E-04        | 2,62E-02           | 1,61E-02 | -5,42E-05       | 4,32E-03           | 3,45E-01 |
| hGDNF              | 3,75E-05         | 2,05E-03           | 5,03E-01 | 4,40E-05        | 3,34E-03           | 4,07E-01 |
| HGF                | -5,37E-05        | 4,35E-03           | 3,29E-01 | 8,68E-05        | 1,32E-02           | 9,80E-02 |
| HSP-27             | -2,82E-05        | 1,47E-03           | 5,71E-01 | -2,87E-05       | 1,81E-03           | 5,42E-01 |
| IL-10              | -8,54E-05        | 1,17E-02           | 1,09E-01 | 5,50E-05        | 3,99E-03           | 3,65E-01 |
| IL-10RA            | -3,42E-05        | 3,22E-03           | 4,01E-01 | 1,43E-05        | 7,66E-04           | 6,92E-01 |
| IL-12B             | -1,02E-04        | 1,43E-02           | 7,63E-02 | -6,47E-05       | 7,21E-03           | 2,23E-01 |
| IL-15RA            | 8,63E-07         | 1,20E-06           | 9,87E-01 | 2,18E-05        | 7,84E-04           | 6,88E-01 |
| IL-17A             | -6,23E-05        | 6,81E-03           | 2,22E-01 | 2,41E-05        | 1,09E-03           | 6,36E-01 |
| IL-17C             | -8,44E-05        | 1,17E-02           | 1,09E-01 | 7,97E-05        | 1,55E-02           | 7,32E-02 |
| IL-18              | 2,70E-05         | 1,18E-03           | 6,12E-01 | -2,44E-05       | 1,56E-03           | 5,72E-01 |
| IL-18R1            | 2,60E-05         | 1,07E-03           | 6,29E-01 | -2,68E-06       | 1,77E-05           | 9,52E-01 |
| IL-20RA            | -6,63E-05        | 2,34E-02           | 2,29E-02 | 5,72E-05        | 1,39E-02           | 8,99E-02 |
| IL-27              | 6,70E-05         | 6,54E-03           | 2,31E-01 | 1,17E-04        | 2,55E-02           | 2,12E-02 |
| IL-5               | -1,31E-05        | 6,46E-04           | 7,07E-01 | -1,58E-05       | 8,57E-04           | 6,75E-01 |
| IL-6               | -5,11E-05        | 4,87E-03           | 3,02E-01 | -3,74E-05       | 1,81E-03           | 5,42E-01 |
| IL-7               | -9,23E-05        | 1,29E-02           | 9,15E-02 | -4,98E-05       | 5,16E-03           | 3,02E-01 |
| IL-8               | -6,45E-05        | 6,82E-03           | 2,21E-01 | 3,59E-05        | 3,48E-03           | 3,97E-01 |
| ITGB1BP2           | -1,09E-06        | 1,76E-06           | 9,84E-01 | -1,13E-04       | 2,33E-02           | 2,78E-02 |
| LIF-R              | -2,97E-05        | 1,13E-03           | 6,19E-01 | 7,69E-05        | 9,42E-03           | 1,63E-01 |
| MIC-A              | -1,31E-04        | 1,47E-02           | 7,18E-02 | 4,77E-05        | 2,77E-03           | 4,50E-01 |
| MK                 | -9,33E-05        | 1,35E-02           | 8,54E-02 | 1,72E-05        | 6,92E-04           | 7,06E-01 |
| MMP-1              | -1,58E-04        | 3,48E-02           | 5,39E-03 | -1,93E-05       | 6,48E-04           | 7,15E-01 |
| MMP-10             | -1,52E-04        | 4,29E-02           | 1,96E-03 | -1,35E-05       | 6,27E-04           | 7,20E-01 |
| MUC-16             | -5,67E-05        | 5,18E-03           | 2,87E-01 | 4,05E-05        | 4,04E-03           | 3,62E-01 |
| NEMO               | -1,55E-05        | 3,22E-04           | 7,91E-01 | -8,66E-05       | 1,07E-02           | 1,37E-01 |
| NT-3               | 2,81E-07         | 1,04E-07           | 9,96E-01 | 2,68E-05        | 1,43E-03           | 5,88E-01 |
| OPG                | -4,52E-05        | 3,29E-03           | 3,96E-01 | 8,74E-06        | 2,14E-04           | 8,34E-01 |

|                |           |          |          |           |          |          |
|----------------|-----------|----------|----------|-----------|----------|----------|
| OSM            | -2,91E-05 | 1,45E-03 | 5,74E-01 | 1,51E-04  | 4,88E-02 | 1,35E-03 |
| PAPP-A         | -4,21E-05 | 2,55E-03 | 4,55E-01 | 1,32E-05  | 3,56E-04 | 7,87E-01 |
| PDGF-subunit-B | -1,09E-04 | 1,55E-02 | 6,47E-02 | -9,43E-05 | 1,64E-02 | 6,50E-02 |
| PSGL-1         | 1,22E-04  | 1,53E-02 | 6,60E-02 | 2,37E-04  | 3,85E-02 | 4,50E-03 |
| PTX3           | -3,66E-05 | 2,01E-03 | 5,07E-01 | 1,12E-04  | 2,10E-02 | 3,69E-02 |
| RAGE           | -6,84E-05 | 6,19E-03 | 2,44E-01 | 4,53E-05  | 3,01E-03 | 4,32E-01 |
| SCF            | -1,73E-04 | 2,68E-02 | 1,48E-02 | 2,78E-05  | 1,26E-03 | 6,10E-01 |
| SIRT2          | -4,45E-05 | 2,82E-03 | 4,32E-01 | -1,04E-04 | 2,09E-02 | 3,70E-02 |
| SLAMF1         | 1,61E-05  | 4,15E-04 | 7,63E-01 | -6,26E-05 | 4,46E-03 | 3,38E-01 |
| SRC            | -5,87E-05 | 2,52E-03 | 4,58E-01 | 6,91E-05  | 3,64E-03 | 3,87E-01 |
| ST1A1          | 9,87E-06  | 1,49E-04 | 8,57E-01 | -1,34E-04 | 3,17E-02 | 1,01E-02 |
| STAMBP         | -4,94E-05 | 3,49E-03 | 3,82E-01 | -7,75E-05 | 1,07E-02 | 1,37E-01 |
| TGFA           | 4,41E-07  | 1,86E-07 | 9,95E-01 | 1,13E-04  | 1,44E-02 | 8,37E-02 |
| TNFB           | -1,38E-04 | 2,87E-02 | 1,16E-02 | 3,64E-05  | 4,05E-03 | 3,61E-01 |
| TNFRSF9        | -1,62E-04 | 2,54E-02 | 1,76E-02 | 5,41E-05  | 4,91E-03 | 3,14E-01 |
| TNFSF14        | -6,82E-06 | 8,18E-05 | 8,94E-01 | -1,85E-05 | 8,02E-04 | 6,85E-01 |
| TRAIL          | -5,89E-05 | 6,27E-03 | 2,41E-01 | 7,54E-05  | 1,47E-02 | 8,06E-02 |
| TRANCE         | -1,59E-06 | 3,78E-06 | 9,77E-01 | -1,60E-05 | 6,71E-04 | 7,10E-01 |
| TWEAK          | -1,18E-04 | 1,36E-02 | 8,41E-02 | -4,97E-05 | 2,97E-03 | 4,35E-01 |
| VEGF-A         | -7,45E-05 | 7,19E-03 | 2,09E-01 | -1,43E-05 | 3,37E-04 | 7,92E-01 |

Supplementary Table 4

| Protein Short Name | Mean abundance levels (Normalized) |                                                 |                                   | P-values (two-sided, wilcoxon-test) |                   |                  |                 |
|--------------------|------------------------------------|-------------------------------------------------|-----------------------------------|-------------------------------------|-------------------|------------------|-----------------|
|                    | Before Diagnosis                   | Controls (1328 to 6166 days prior to diagnosis) | After Diagnosis (28 to 1605 days) | At diagnosis                        | Before vs Control | Control vs After | Before vs After |
| 4E-BP1             | -2,12E-01                          | -5,78E-02                                       | -1,46E-01                         | 2,58E-01                            | 3,41E-01          | 5,79E-01         | 6,94E-01        |
| AR                 | -2,25E-01                          | -6,40E-02                                       | -1,56E-01                         | 1,07E+00                            | 2,49E-01          | 4,58E-01         | 5,92E-01        |
| AXIN1              | -4,87E-02                          | -1,59E-02                                       | 5,37E-02                          | -2,59E-01                           | 8,37E-01          | 6,68E-01         | 5,57E-01        |
| CCL28              | -1,47E-01                          | -1,11E-01                                       | 1,90E-01                          | 3,10E-01                            | 8,00E-01          | 7,51E-02         | 4,21E-02        |
| CD244              | 3,22E-02                           | 7,83E-04                                        | 1,67E-01                          | -6,70E-01                           | 8,42E-01          | 2,32E-01         | 3,70E-01        |
| CD40               | -1,31E-01                          | 9,09E-03                                        | 3,90E-02                          | -2,13E-01                           | 3,50E-01          | 8,29E-01         | 2,43E-01        |
| CD40-L             | -1,59E-01                          | 3,03E-03                                        | 2,99E-03                          | 8,94E-01                            | 3,24E-01          | 1,00E+00         | 3,73E-01        |
| FR-alpha           | -4,02E-01                          | 5,90E-04                                        | -2,40E-01                         | 6,35E-01                            | 4,87E-03          | 9,99E-02         | 2,59E-01        |
| FS                 | -1,33E-02                          | -1,12E-01                                       | 1,44E-01                          | 6,95E-01                            | 5,56E-01          | 8,53E-02         | 3,57E-01        |
| HB-EGF             | -3,56E-01                          | -7,25E-02                                       | -1,20E-01                         | 1,11E+00                            | 1,66E-01          | 7,80E-01         | 2,66E-01        |
| hGDNF              | -9,94E-02                          | -1,61E-01                                       | 6,76E-02                          | 1,31E-01                            | 6,88E-01          | 1,61E-01         | 3,18E-01        |
| HSP-27             | -4,10E-01                          | -4,40E-01                                       | -4,05E-01                         | 4,89E-01                            | 8,28E-01          | 8,17E-01         | 9,75E-01        |
| IL-15RA            | -1,25E-01                          | -3,90E-02                                       | -4,29E-02                         | -2,22E-02                           | 5,55E-01          | 9,81E-01         | 6,25E-01        |
| IL-27              | 1,50E-02                           | -4,51E-02                                       | -1,79E-02                         | 1,55E+00                            | 6,95E-01          | 8,56E-01         | 8,36E-01        |
| IL-5               | -9,09E-01                          | -8,86E-01                                       | -9,80E-01                         | -9,44E-01                           | 8,06E-01          | 2,87E-01         | 4,01E-01        |
| IL-7               | -1,65E-01                          | -1,31E-02                                       | 5,57E-02                          | 6,21E-02                            | 3,10E-01          | 6,35E-01         | 1,43E-01        |
| ITGB1BP2           | -2,52E-01                          | -2,92E-01                                       | -2,62E-01                         | 5,18E-01                            | 7,92E-01          | 8,49E-01         | 9,49E-01        |
| MK                 | -2,07E-01                          | -1,76E-02                                       | -1,13E-02                         | 1,41E+00                            | 2,02E-01          | 9,65E-01         | 1,98E-01        |
| NEMO               | -4,47E-02                          | -3,07E-02                                       | 7,48E-02                          | 5,79E-01                            | 9,31E-01          | 5,24E-01         | 5,13E-01        |
| NT-3               | -1,14E-01                          | -2,81E-02                                       | 1,13E-01                          | -1,36E-02                           | 5,95E-01          | 3,71E-01         | 1,71E-01        |
| PAPP-A             | -1,01E-01                          | -8,89E-02                                       | -1,90E-01                         | 1,00E+00                            | 9,36E-01          | 5,21E-01         | 5,91E-01        |
| PTX3               | -1,30E-01                          | -8,87E-03                                       | -2,51E-01                         | 1,78E+00                            | 4,23E-01          | 1,19E-01         | 4,62E-01        |
| RAGE               | -2,36E-01                          | -6,10E-03                                       | -3,07E-01                         | -5,76E-01                           | 1,53E-01          | 8,72E-02         | 6,98E-01        |
| SIRT2              | -1,26E-01                          | -2,61E-02                                       | 1,56E-02                          | 3,34E-01                            | 5,19E-01          | 7,87E-01         | 3,82E-01        |
| SRC                | -3,53E-01                          | -9,59E-02                                       | -3,55E-01                         | 4,86E-01                            | 2,36E-01          | 2,36E-01         | 9,91E-01        |
| ST1A1              | -4,45E-02                          | -2,01E-02                                       | 3,43E-02                          | -1,31E-02                           | 8,71E-01          | 7,25E-01         | 6,21E-01        |
| STAMBP             | -1,39E-01                          | -1,44E-02                                       | -1,56E-02                         | -8,02E-02                           | 4,21E-01          | 9,94E-01         | 4,53E-01        |
| VEGF-A             | -1,89E-01                          | 1,63E-02                                        | 2,52E-02                          | 3,36E-01                            | 2,06E-01          | 9,54E-01         | 2,14E-01        |
